# Supplementary material
Source: Elsevier journal article supplement (https://arts.units.it/retrieve/4a01155f-5182-4d8f-9656-50c707f0f4e9/mmc2.pdf)
Supplement: mmc2 [file mmc2.pdf]

## Beat Rate at 60days

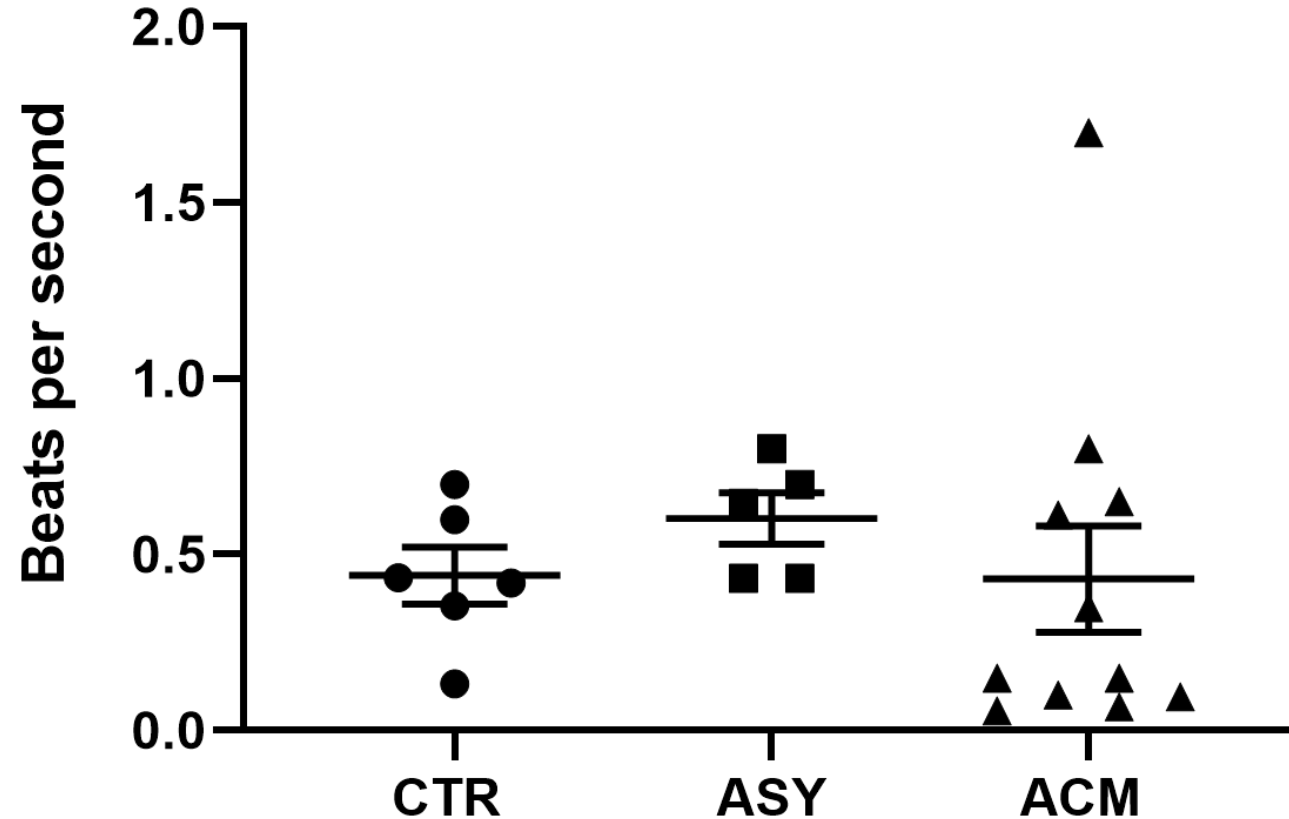

**Fig. S2:** Beat Rate in hiPSC-CMs at 60 days after differentiation, in basal condition. Data were collected from 6, 5, 11 independent experiments for one clone of the CTR line, for ASY line D and for ACM line A, respectively.  $p$  value = ns. Kruskal-Wallis test followed by multiple comparisons test.
